# Supplementary material
Source: PubMed Central journal article supplement (PMC3457224)
Supplement: JB.00543-12_zjb999091978so1.pdf [file JB.00543-12_zjb999091978so1.pdf]

## Supplemental Table 1: Sequence of the PCR primers used in this study

### Gene inactivation of *sll0822*

|             |                                        |               |
|-------------|----------------------------------------|---------------|
| sll0822M-FW | GCCTGGGCCAATTGATATCC                   |               |
| sll0822M-RV | GCTGCCATCCTGTTGCCATT                   |               |
| sll0822R4   | GGGCTTGGTTGCGTTCCCGGGAGCCATTCAAGTTTTTC | <i>SmaI</i>   |
| sll0822A4   | AGGTGGGGGCTTGGCTCCCGGGAACGTAAGGCTAATT  | <i>SmaI</i>   |
| KmHinCFW    | GGCGCTGAGGTTCGACCTCGTGAAGAAG           | <i>HincII</i> |
| KmHinCRV    | ACCTGCAGGGGGTTCGACGGAAAGCCAC           | <i>HincII</i> |

### Cloning of *sll0822* coding sequence at *NdeI-EcoRI* sites of *pFC1* for heat inducible overexpression of *AbrB2*

|             |                                    |
|-------------|------------------------------------|
| sll0822FL1: | TCACCGAAAACACTCATATGGCTAAATCAAACGC |
| sll0822FL2: | CATTAGTCCCAGCGAATTCGCCTTACTCTTCT   |

### Cloning of *hox* and *sll0822* promoter regions in the promoter probe vectors

#### *hox* promoter

|               |                                           |             |
|---------------|-------------------------------------------|-------------|
| pSB2A_hox1 Fw | GCGCTGTAAATAAAAAGCCGGCATTGATAATTTATTTCTCG | <i>NaeI</i> |
| pSB2A_hox2 Fw | CCCTAGAAATCACTTGTAAACAACACCCAGAACCTAGTAAC | <i>HpaI</i> |
| pSB2A_hox3 Fw | GGCTAGCAATTGGGGTCCGCGACTATTTTC            | <i>NruI</i> |
| pSB2A_hox4 Fw | CACTAAAGGGAAGTTCGCGATATTAATTTAGTTACG      | <i>NruI</i> |
| pSB2A_hox5 Fw | TGATGTAACAATGCCGGCAACCAACTAGAGATTC        | <i>NaeI</i> |
| pSB2A_hox7 Rv | CGATCGGTGGCAGACGTCATGGAAAAATCCTCA         | <i>ZraI</i> |

#### *sll0822* promoter

|           |                                |              |
|-----------|--------------------------------|--------------|
| SnaBIFW22 | AGCCATCCTTTACGTACAACACTATCCCAT | <i>SnaBI</i> |
| SnaBIRV22 | CGTTTGATTTTACGTATCAAGTTTTCGG   | <i>SnaBI</i> |

### qPCR

|                   |                       |
|-------------------|-----------------------|
| HoxE Left         | GCCCATCCTAGTGGAGACAA  |
| HoxE Right        | GGTAAAAAGTCGCCACTCCA  |
| HoxF Left         | TGAAATGACCCAGAGGAAG   |
| HoxF Right        | ATACCTTCGAGGATGCGATG  |
| Hox sll1222 Left  | TGCTATGGCTATCCCCTCTG  |
| Hox sll1222 Right | AGCTCCCTTGGTTTTCCATT  |
| HoxU Left         | GTTTGTGCATGGTGGAAAGTG |
| HoxU Right        | ATTCACAGTTGCCGTTAGCC  |
| HoxY Left         | CTCAAGGAATACCCGGACAA  |
| HoxY Right        | AGAACCGGATCGCTACCTTT  |
| Hox ssl2420 Left  | CCCCAGAGGAGCAAAAAGTTA |
| Hox ssl2420 Right | TCTTGGGTCTTTCCCTCACG  |
| Hox sll1225 Left  | TGTCCGACTTCTTGTGGGTA  |
| Hox sll1225 Right | AGCAATTTGGGCTTGAGTGT  |
| HoxH Left         | CTGCGCCGTTTAATGAATTT  |
| HoxH Right        | CACTGACCAAGCAGAGTGGA  |
| RnpB Left         | GTGAGGACAGTGCCACAGAA  |
| RnpB Right        | GGCAGGAAAAAGACCAACCT  |

*Cloning into pET14b for over-expression and purification of 6His-Sll0822 from E.coli*

abrB2-NdeI-Fw      GAATTCATATGGCTAAATCAAACGCAACC  
abrB2-BamHI-Rv :    CGGGATCCTTACTCTTCTTCGTCGTCAGCCC

*Promoter fragments for EMSA*

**hox promoter**

Hox\_gelshift Fw1      CGATATTAATTTAGTTACGAAATATTAACAAAATCTAGTGC  
Hox\_gelshift Fw2      ATTAAGTAATCGACATTGAAGAAAGCTAAAGATTT  
Hox\_gelshift Fw3      CAACCAACTAGAGATTCCATTCGTTATTG  
Hox\_gelshift Rv4      CCTTCATTGTTACATCAACTTTTAAAAAGTGAG  
Hox\_gelshift Rv5      CCTTAGTCGGGAAAGAATTTGTGTG  
Hox\_gelshift Rv6      GTCATGGAAAAATCCTCAAAAAGGAGC

**abrB2 promoter:**

0822\_gelshift Fw      CAACTATCCCATTAATTAACTATTTATTT  
0822\_gelshift Rv      TCAAGTTTTCGGTGATTGAG  
0822\_gelshift mid Fw    AAGCAGGGTAGCAAGGA  
0822\_gelshift mid Rv    CTACCCTGCTTATATTACACG

**Control hoxY protein coding sequence:**

hoxY Fw              TTGGTTCTGATCTCAAGGAATACCCG  
hoxY Rv              AATACGGTGGGCATCGGG

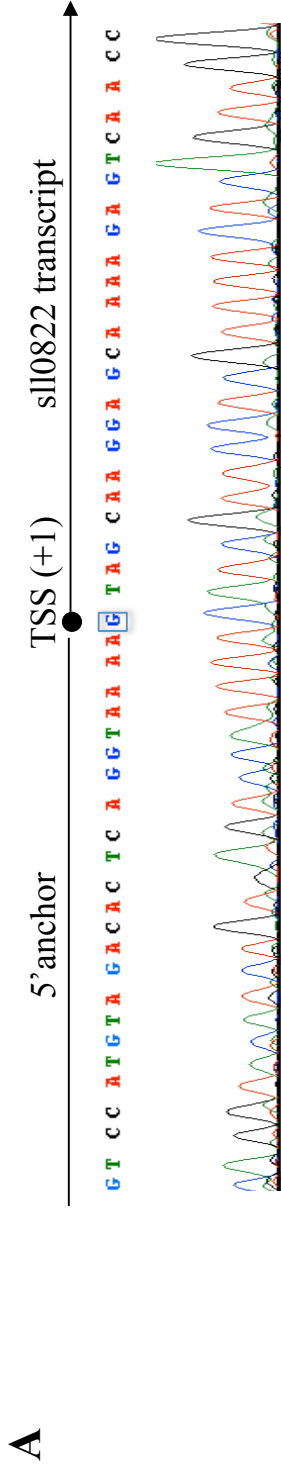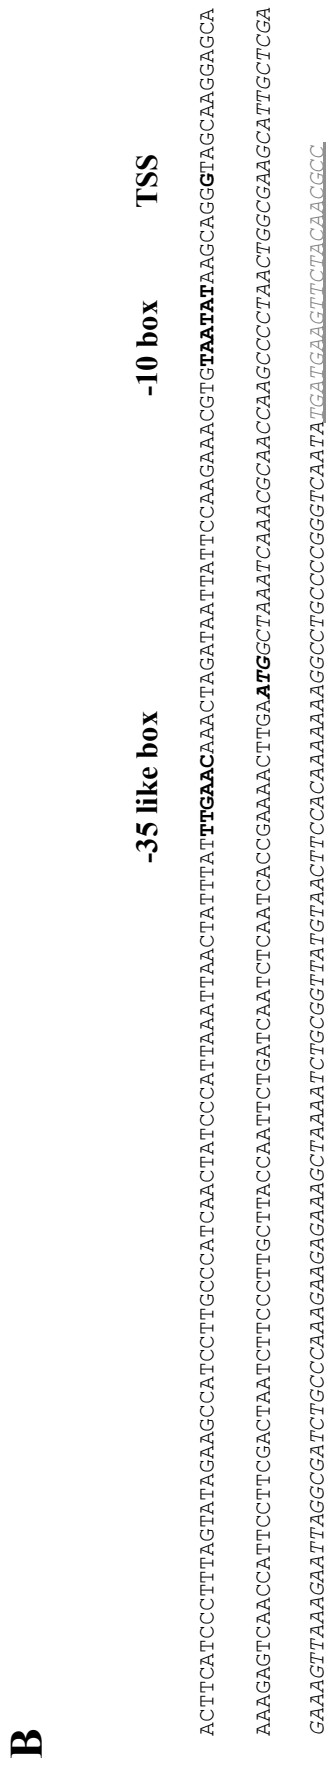

**Fig. S1 Determination of the transcription start site (TSS) of the *abrB2* (sll0822) gene with the 5'RACE technique:**

(A) Part of the nucleotide sequence of the RT-PCR DNA products amplified with both the 5' anchor and the sll0822 specific reverse primer (sll0822P1; Table S1) whose complementary sequence is written in grey underlined letters in panel B. The first nucleotide immediately downstream the 5' anchor sequence is the sll0822 transcription start site (TSS; the G nucleotide noted as +1). (B) Nucleotide sequence of the sll0822 promoter region showing the -35-like element (TTGAAC), the -10 promoter box (TATAAT) and the TSS (G) nucleotides in bold cases. The ATG start codon and the beginning of the protein coding sequence of sll0822 are written in italics.

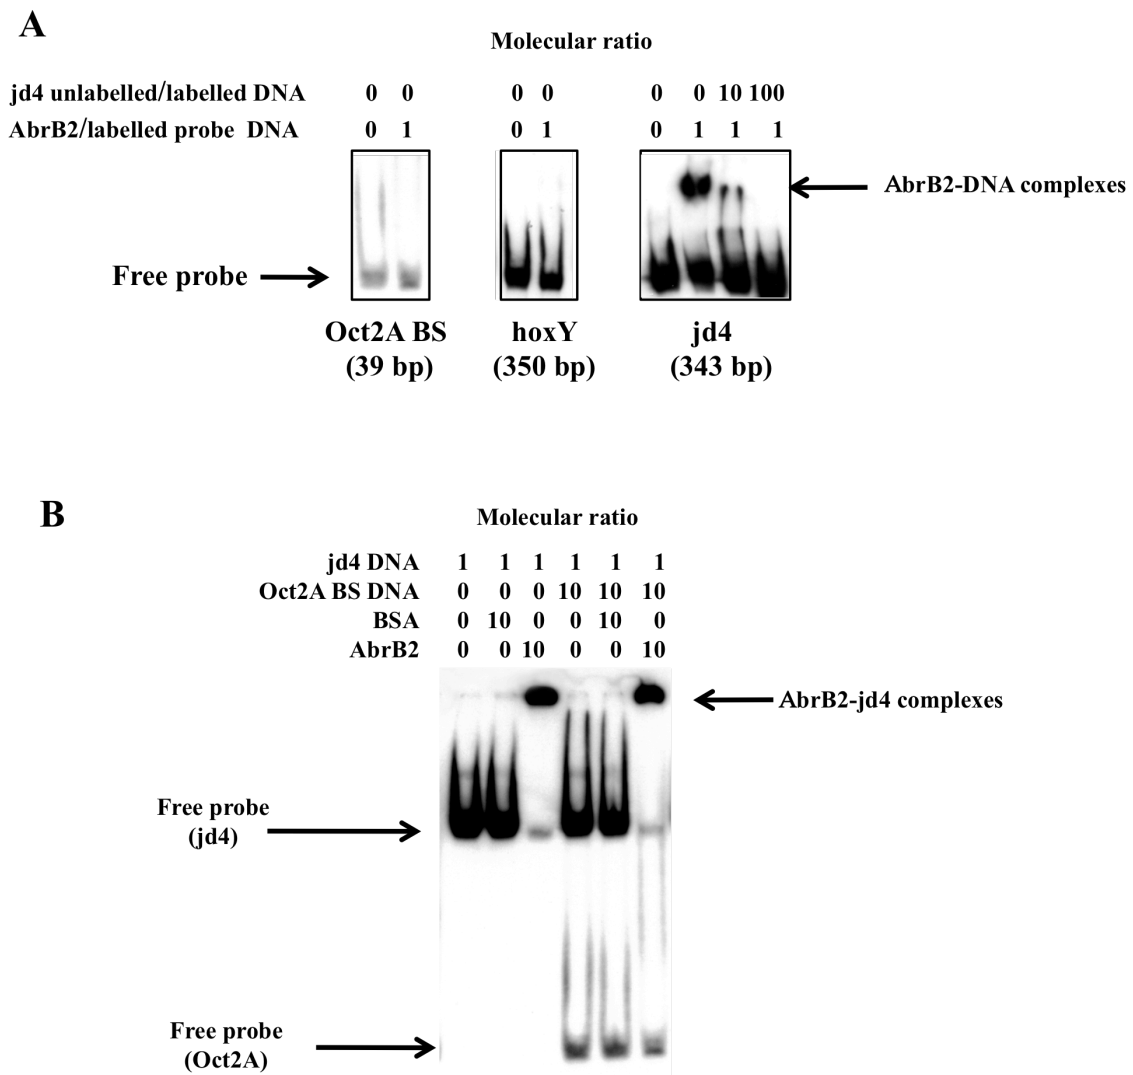

**Fig. S2. Electrophoretic migration-shift assay showing that AbrB2 binds specifically onto the *hox*-promoter DNA.**

- (A) Analysis of the electrophoretic mobility of various DIG-labelled DNA fragments following incubation with or without the 6xHis-tagged AbrB2 regulator or the BSA control protein. The tested DNA probes are namely: Oct2A DNA binding sequence (control DNA provided by Roche), segment of *hoxY* protein coding sequence (prepared with the PCR primers presented in Table S1) and the *jd4* segment of the *hox*-operon promoter, which was also used as an unlabelled specific DNA competitor. The size of the three DNA fragments used as probes of AbrB2 binding are indicated underneath. Arrows indicate the positions of free DNA probes and the *jd4*-AbrB2 retarded complexes.
- (B) Analysis of the electrophoretic mobility of the DIG-labelled *jd4* promoter region in presence (competition) or absence of Oct2A DNA binding sequence, following incubation with or without the 6xHis-tagged AbrB2 regulator or the BSA control protein. Arrows indicate the positions of free DNA probes and the *jd4*-AbrB2 retarded complexes.

## hox promoter region (JD4)

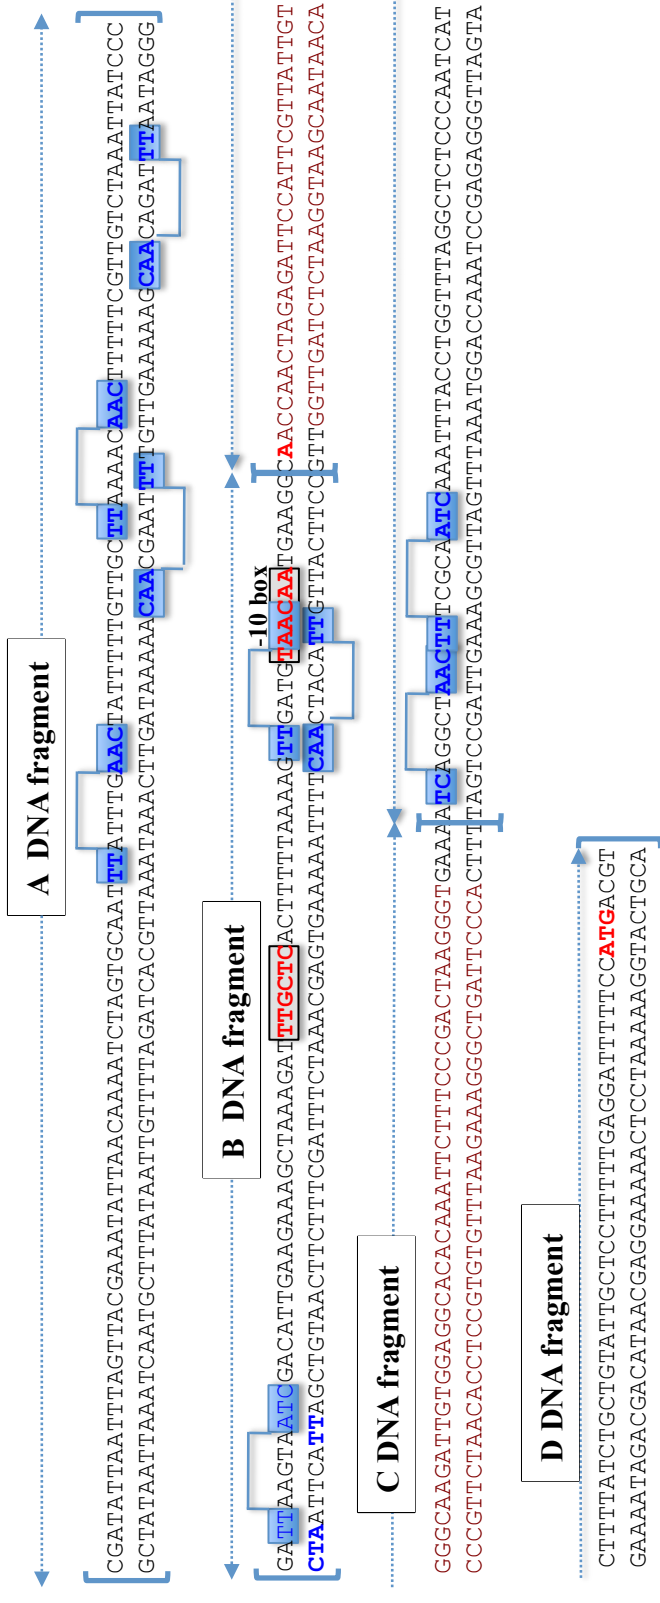

## AbrB2 promoter

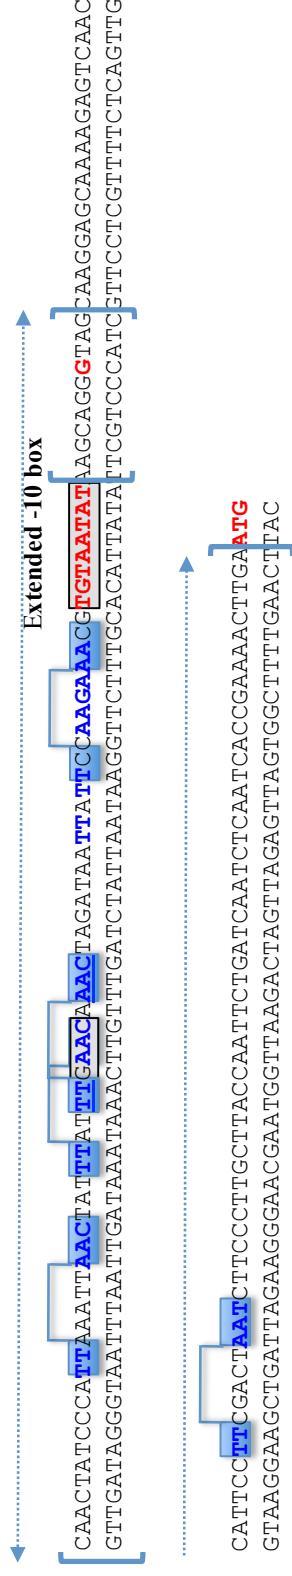

**Fig.S3** Nucleotide sequence of the promoters of the *abrB2* gene and the *hoxEFUYH* operon (jd4 DNA segment) showing in red cases, the promoter boxes (enlighted in grey), the transcription start sites and the ATG start codon of the *abrB2* and *HoxE* genes, and in blue the TTn5AAC repeated. Note that this motif is absent from the sequence (written in purple) of C subfragment of the jd4 hox-operon promoter which does not bind AbrB2. Furthermore, our assumption that the consensus TTn5AAC motif is negatively acting on promoter activity in binding the AbrB2 repressor is supported by our finding that the TT to GG transversion mutagenesis of the TTn5AAC motif (TTGAAACAAC) overlapping the TTGAC motif resembling a -35 promoter box led to an increase (not decrease) in the *abrB2* promoter activity.
